# Supplementary material for: Stereocomplexed and homocrystalline thermo-responsive physical hydrogels with a tunable network structure and thermo-responsiveness
Source: Royal Society of Chemistry journal article supplement (doi:10.1039/d0tb01484b), 2020-01-01
Supplement: d0tb01484b1.pdf [file d0tb01484b1.pdf]

## Supplementary Information

# **Stereocomplexed and Homocrystalline Thermo-Responsive Physical Hydrogels with Tunable Network Structure and Thermo- Responsiveness**

*Kangkang Liu,<sup>a</sup> Heqing Cao,<sup>a</sup> Wenhua Yuan,<sup>a</sup> Yongzhong Bao,<sup>a</sup> Guorong Shan,<sup>a</sup> Zi Liang Wu,<sup>b</sup>  
Pengju Pan<sup>\*a</sup>*

<sup>a</sup>State Key Laboratory of Chemical Engineering, College of Chemical and Biological Engineering, Zhejiang University, Hangzhou 310027, China

<sup>b</sup>Ministry of Education Key Laboratory of Macromolecular Synthesis and Functionalization, Department of Polymer Science and Engineering, Zhejiang University, Hangzhou 310027, China

## Supplementary Experimental Section

**Synthesis of PLLA and PDLA macromonomers.** A typical procedure for synthesizing the HEMA-terminated PLLA macromonomer with an expected degree of polymerization (DP) of 30 is shown as follows. L-Lactide (26.6 g, 0.18 mol) was added into a Schlenk flask and then dried in vacuum at 20 °C for 1 h. After purging the flask with dry argon, HEMA (1.6 g, 0.012 mol), Sn(Oct)<sub>2</sub> (141 mg, 0.5 wt%), and toluene (80 mL) were injected into the flask. The mixture was heated up to 110 °C and held at this temperature for 10 h for polymerization. The product was isolated by precipitation into an excess of ethyl ether/*n*-hexane (1/1, v/v) and the precipitate was dried *in vacuo* at 50 °C for 12 h to yield the macromonomer (25.0 g, 89%). PDLA macromonomer was synthesized by the same method using D-lactide as the monomer.

**Characterizations.** Molecular structures were characterized on a <sup>1</sup>H-NMR spectrometer (400 MHz, Bruker AVANCE II, Bruker BioSpin Co., Switzerland) with the solvents of CDCl<sub>3</sub> for macromonomers and DMSO-*d*<sub>6</sub> for copolymers.

Molecular weights of PLLA and PDLA macromonomers were measured on a gel permeation chromatography (GPC, Waters 1525/2414, Waters Co., USA) with THF as the mobile phase and polystyrene as the standard. Molecular weights of PNIPAM-*g*-PLLA and PNIPAM-*g*-PDLA copolymers were measured on a GPC (Waters 208, Waters Co., USA) with pure DMF as the mobile phase and PMMA as the standard.

TEM observations were made on a HT-7700 microscope operating at an acceleration voltage of 120 kV.

Morphology of HC/SC bilayer hydrogel at the boundary was characterized by a confocal laser scanning microscope (Zeiss LSM700).

Thermal behavior of hydrogels was measured on a differential scanning calorimetry (DSC25, TA Instruments, USA). The sample was heated from 10 to 50 °C at a heating rate of 5 °C/min.

**Table S1** Molecular weight and polydispersity of PLLA, PLLA macromonomers and

PNIPAM-*g*-PLLA, PNIPAM-*g*-PDLA copolymers determined by GPC

| Sample    | $M_n$ (kg/mol) | $\bar{D}$ |
|-----------|----------------|-----------|
| HEMA-PLLA | 2.98           | 1.13      |
| HEMA-PDLA | 3.01           | 1.12      |
| L-0.10    | 156            | 2.78      |
| D-0.10    | 165            | 2.73      |

**Table S2** Yield and composition of synthesized PNIPAM-*g*-PLLA and PNIPAM-*g*-PDLA copolymers

| Copolymer | Yield (%) | Mass fraction of PLA macromonomer, $M_{PLA}$ |                              |
|-----------|-----------|----------------------------------------------|------------------------------|
|           |           | In feed                                      | measured by $^1\text{H-NMR}$ |
| L-0.05    | 85.5      | 0.05                                         | 0.053                        |
| L-0.10    | 86.0      | 0.10                                         | 0.096                        |
| L-0.15    | 91.9      | 0.15                                         | 0.146                        |
| L-0.20    | 94.0      | 0.20                                         | 0.229                        |
| L-0.25    | 92.0      | 0.25                                         | 0.274                        |
| D-0.10    | 90.0      | 0.10                                         | 0.108                        |
| D-0.15    | 88.3      | 0.15                                         | 0.159                        |

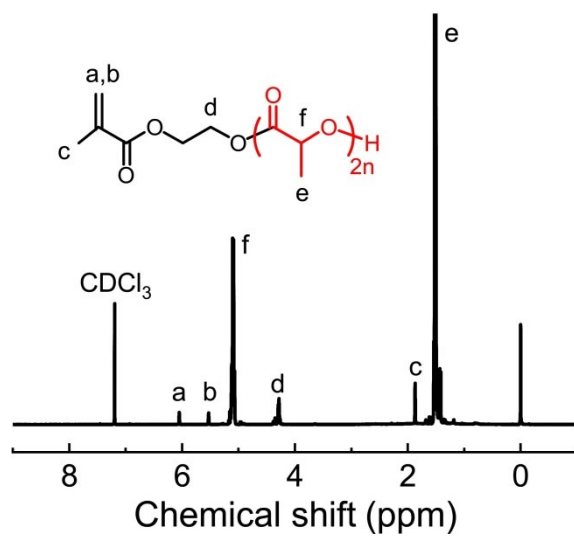

**Fig. S1** <sup>1</sup>H-NMR spectrum of PLLA macromonomer (DP = 30).

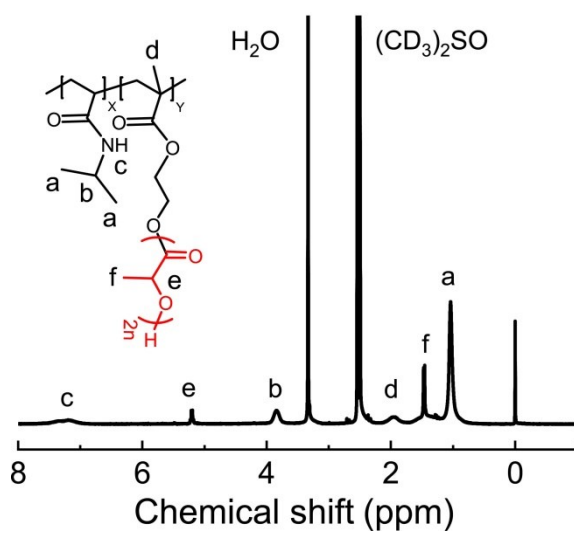

**Fig. S2** <sup>1</sup>H-NMR spectrum of PNIPAM-g-PLLA ( $M_{PLA} = 0.10$ ).

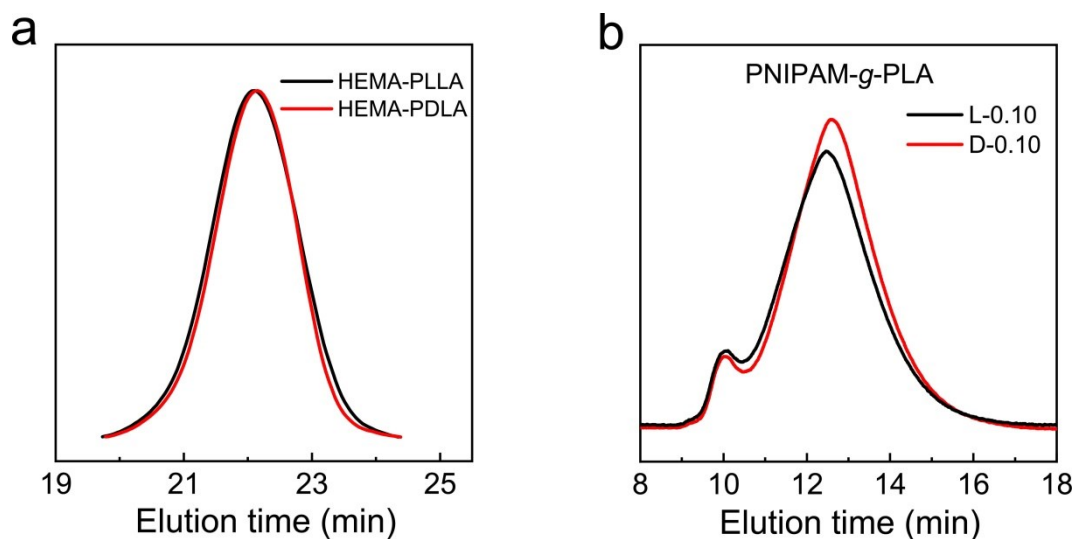

**Fig. S3** GPC curves. (a) PLLA and PDLA macromonomers; (b) PNIPAM-*g*-PLLA and PNIPAM-*g*-PDLA copolymers. The small peak at the short elution time in Fig. S3b is likely caused by the aggregation of PNIPAM-*g*-PLA in DMF.

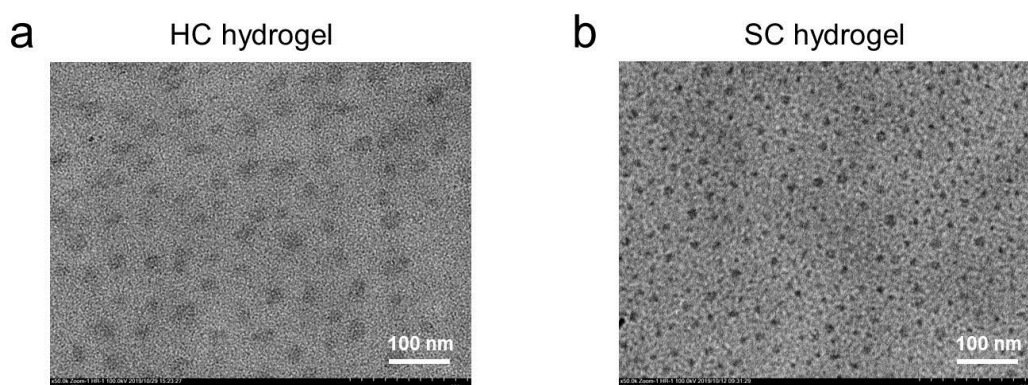

**Fig. S4** TEM images of hydrogels ( $M_{PLA} = 0.10$ ). (a) HC hydrogel ( $F_D = 0$ ). (b) SC hydrogel ( $F_D = 0.5$ ).

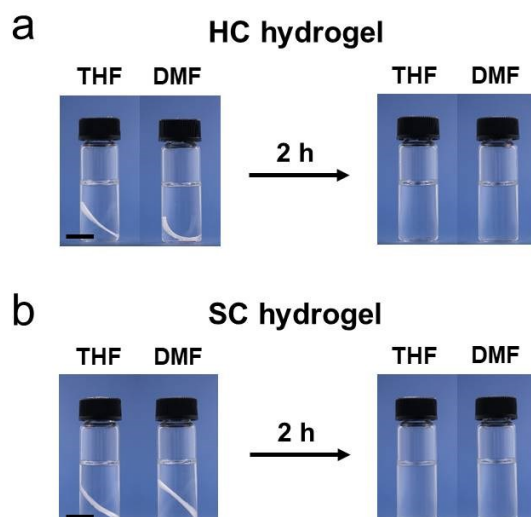

**Fig. S5** Images of swollen hydrogels ( $M_{PLA} = 0.10$ ) in different solvents at 20 °C. (a) HC hydrogel ( $F_D = 0$ ). (b) SC hydrogel ( $F_D = 0.5$ ). Scale bar: 1 cm.

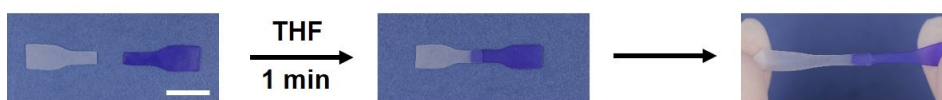

**Fig. S6** THF-assisted healing of HC hydrogel ( $F_D = 0$ ) at 20 °C. Scale bar: 1 cm.

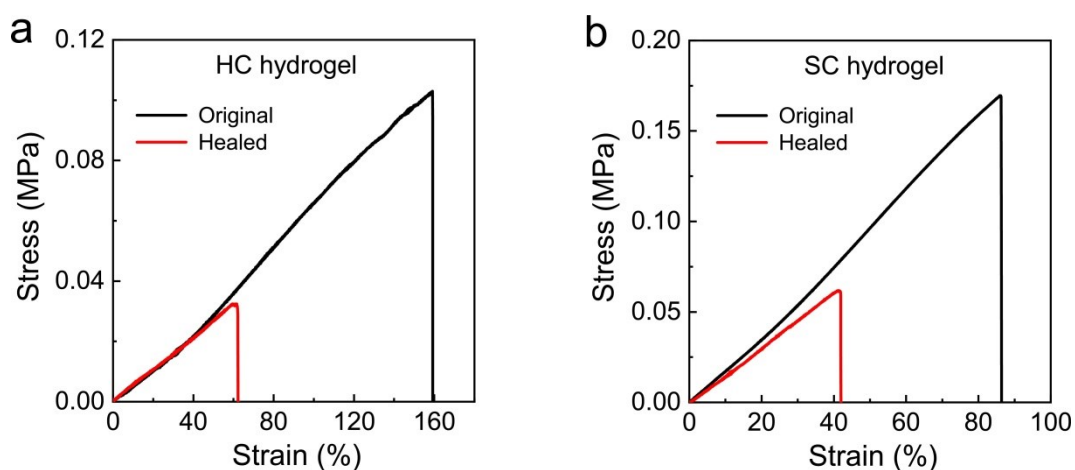

**Fig. S7** Stress-strain curves of the original and healed hydrogels ( $M_{PLA} = 0.10$ ). (a) HC hydrogel ( $F_D = 0$ ). (b) SC hydrogel ( $F_D = 0.5$ ).

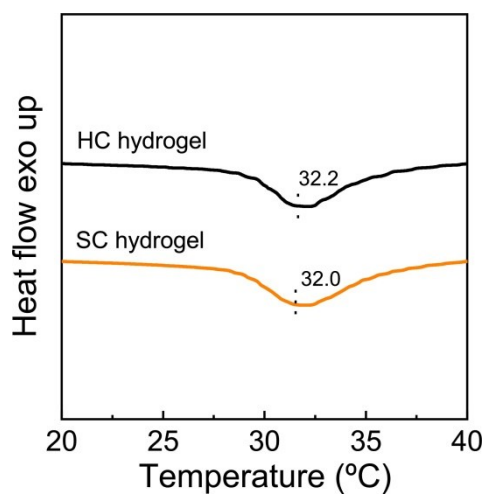

**Fig. S8** DSC heating curves of HC ( $F_D = 0$ ) and SC hydrogels ( $F_D = 0.5$ ) with  $M_{PLA} = 0.10$ . The endothermic peak represents VPTT transition of hydrogel.

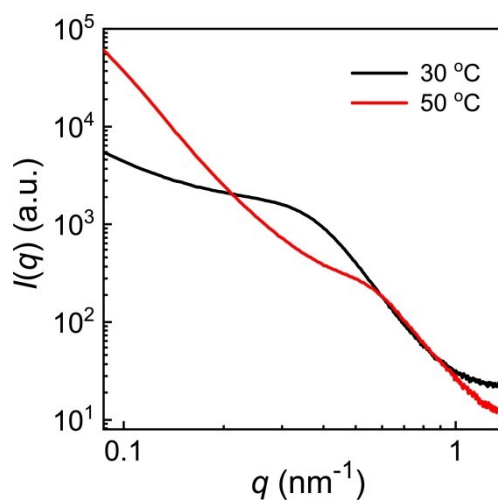

**Fig. S9** Temperature-variable SAXS profiles of SC hydrogels ( $F_D = 0.5$ ,  $M_{PLA} = 0.10$ ).

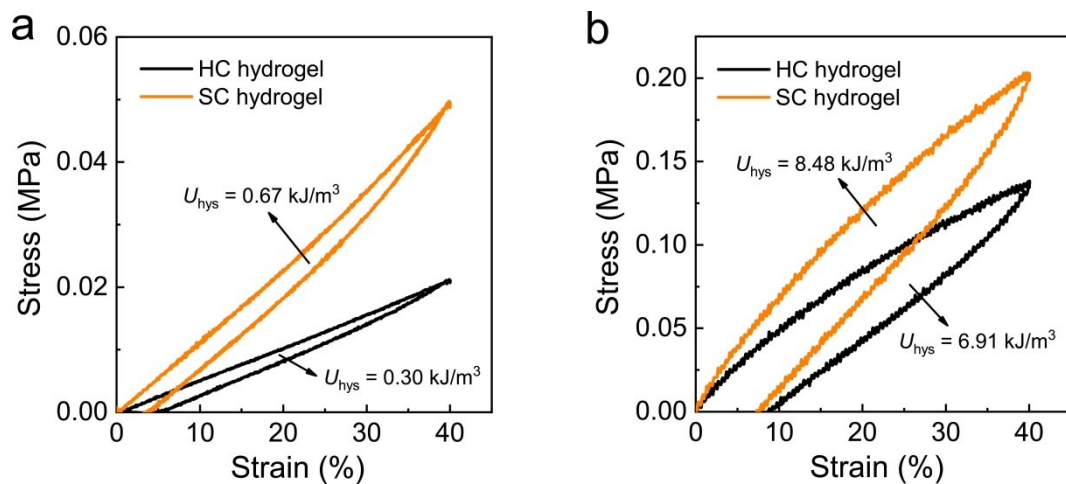

**Fig. S10** Tensile loading-unloading curves of HC ( $F_D = 0$ ) and SC hydrogels ( $F_D = 0.5$ ) with  $M_{\text{PLA}} = 0.10$  at (a) 20 °C and (b) 50 °C. The tests were conducted under a strain rate of 5 mm/min. Dissipated energy ( $U_{\text{hys}}$ ) was estimated from the area between the loading-unloading curves. SC hydrogel had a larger  $U_{\text{hys}}$  at both 20 °C and 50 °C, suggesting that the hydrophobic SC domains of SC hydrogel are more effective to dissipate the energy.
